# Supplementary material for: A novel three-dimensional heterometallic compound: templated assembly of the unprecedented planar “Na⊂[Cu4]” metalloporphyrin-like subunits
Source: Royal Society of Chemistry journal article supplement (doi:10.1039/b618296h), 2007-01-01
Supplement: b618296h.pdf [file b618296h.pdf]

## Supporting Information for B618296H

### A novel three-dimensional heterometallic compound: templated assembly of the unprecedented planar “Na<sub>4</sub>[Cu<sub>4</sub>]” metalloporphyrin-like subunits

Yan-Feng Yue,<sup>a</sup> Bing-Wu Wang,<sup>a</sup> En-Qing Gao,<sup>b</sup> Chen-Jie Fang,<sup>a</sup> Cheng He<sup>a</sup> and Chun-Hua Yan<sup>\*a</sup>

<sup>a</sup> Beijing National Laboratory for Molecular Sciences, State Key Lab of Rare Earth Materials Chemistry and Applications & PKU-HKU Joint Lab on Rare Earth Materials and Bioinorganic Chemistry, Peking University, Beijing 100871, China. Fax: +86 (10) 6275 4179; Tel: +86 (10) 6275 4179; E-mail: yan@pku.edu.cn

<sup>b</sup> Shanghai Key Lab of Green Chemistry and Chemical Process Greening, East China Normal University, Shanghai 200062, China.

#### 1. Preparation of 1 in different routes of 1 and 2

**Route 1:** Hydrothermal treatment of Cu(NO<sub>3</sub>)<sub>2</sub>·6H<sub>2</sub>O (0.4 mmol), but-2-ynedioic acid (1 mmol), NaN<sub>3</sub> (2.0 mmol), and water (9.0 mL) for 4 days at 150 °C yielded deep-blue rhombic crystals. The yield was about 35% based on but-2-ynedioic acid. The final pH value of the reaction mixture was about 7. Elemental analysis (%) calcd. for C<sub>16</sub>H<sub>14</sub>N<sub>12</sub>O<sub>23</sub>Cu<sub>4</sub>Na<sub>4</sub>: C 17.66, H 1.30, N 15.44; found C 17.78, H 1.53, N 15.72. IR data ( $\bar{\nu}$ , cm<sup>-1</sup>): 3619(m), 3510(m), 3400(m), 3304(m), 1688(s), 1650(vs), 1390(s), 1346(m), 1326(m), 1199(w), 1140(m), 863(w), 788(m).

**Route 2:** Hydrothermal treatment of Cu(NO<sub>3</sub>)<sub>2</sub>·6H<sub>2</sub>O (0.4 mmol), 1,2,3-triazole-4,5-dicarboxylic acid (0.2 mmol), NaOH (1.0 mmol), and water (5.0 mL) for 4 days at 150 °C yielded deep-blue powder samples. Elemental analysis (%) calcd. for C<sub>16</sub>H<sub>14</sub>N<sub>12</sub>O<sub>23</sub>Cu<sub>4</sub>Na<sub>4</sub>: C 17.66, H 1.30, N 15.44; found C 17.63, H 1.82, N 15.99. IR data ( $\bar{\nu}$ , cm<sup>-1</sup>): 3619(m), 3513(m), 3405(m), 3302(m), 1685(s), 1650(vs), 1390(s), 1346(m), 1326(m), 1199(w), 1140(m), 863(w), 787(m) cm<sup>-1</sup>.

## 2. Simulated and experimental powder XRD patterns for the product of Route 2

The following figure gives the powder XRD patterns for **1** of **Route 2**. The patterns measured for the bulk samples are in good agreement with those calculated from the single crystal data.

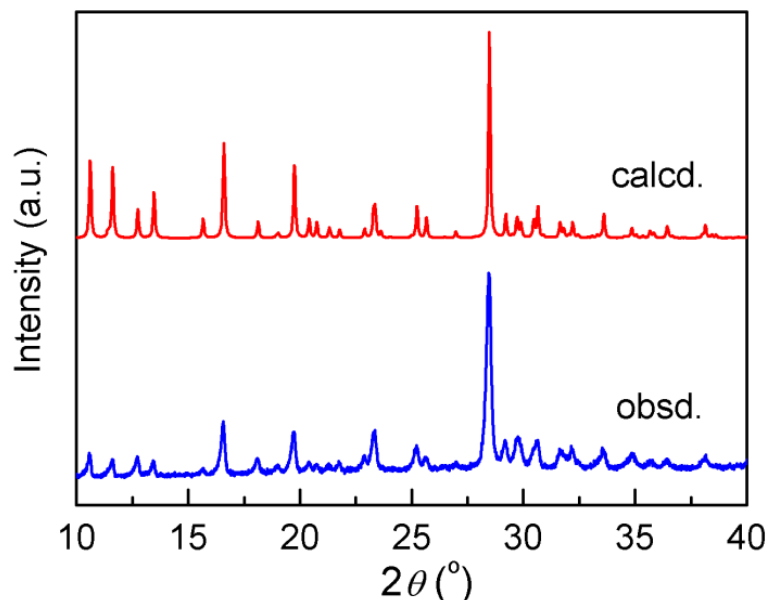

Figure S1. Simulated and experimental powder XRD patterns for the product of **Route 2**.

## 3. Calculation details

All the calculations are carried out with the Gaussian 03 program package<sup>1</sup>. An all-electron triple- $\zeta$  basis set is used for copper atom while double- $\zeta$  basis sets are used for all the other atoms. The d and f type functions are added to account the polarization and diffusion effect

## References

1 Gaussian 03, Revision A.1, M. J. Frisch, G. W. Trucks, H. B. Schlegel, G. E. Scuseria, M. A. Robb, J. R. Cheeseman, J. A. Montgomery, Jr., T. Vreven, K. N. Kudin, J. C. Burant, J. M. Millam, S. S. Iyengar, J. Tomasi, V. Barone, B. Mennucci, M. Cossi, G. Scalmani, N. Rega, G. A. Petersson, H. Nakatsuji, M. Hada, M. Ehara, K. Toyota, R. Fukuda, J. Hasegawa, M. Ishida, T. Nakajima, Y. Honda, O. Kitao, H. Nakai, M. Klene, X. Li, J. E. Knox, H. P. Hratchian, J. B. Cross, C. Adamo, J. Jaramillo, R. Gomperts, R. E. Stratmann, O. Yazyev, A. J.

Austin, R. Cammi, C. Pomelli, J. W. Ochterski, P. Y. Ayala, K. Morokuma, G. A. Voth, P. Salvador, J. J. Dannenberg, V. G. Zakrzewski, S. Dapprich, A. D. Daniels, M. C. Strain, O. Farkas, D. K. Malick, A. D. Rabuck, K. Raghavachari, J. B. Foresman, J. V. Ortiz, Q. Cui, A. G. Baboul, S. Clifford, J. Cioslowski, B. B. Stefanov, G. Liu, A. Liashenko, P. Piskorz, I. Komaromi, R. L. Martin, D. J. Fox, T. Keith, M. A. Al-Laham, C. Y. Peng, A. Nanayakkara, M. Challacombe, P. M. W. Gill, B. Johnson, W. Chen, M. W. Wong, C. Gonzalez and J. A. Pople, Gaussian, Inc., Pittsburgh PA, 2003.
